# Supplementary material for: Chameleon clothes for quantitative oxygen imaging
Source: Royal Society of Chemistry journal article supplement (doi:10.1039/c1jm14162g), 2011-01-01
Supplement: c1jm14162g.pdf [file c1jm14162g.pdf]

Supplementary Material (ESI) for Chemical Communications

This journal is (c) The Royal Society of Chemistry 2007

## Electronic Supplementary Information

### Experimental Section

**Materials and Reagents:** 4,4'-Bis(2-benzoxazolyl)stilbene, platinum octaethylporphyrin, styrene and methacrylic acid were purchased from Sigma-Aldrich ([www.sigmaaldrich.com](http://www.sigmaaldrich.com)); polyvinylpyrrolidone K-30 was obtained from Sinopharm Chemical Reagent Co. Ltd, Shanghai, China;  $\alpha,\alpha'$ -Azobisisobutyronitrile (Sinopharm Chemical Reagent Co. Ltd, Shanghai, China) was recrystallized from ethanol and stored in the dark; and polyurethane hydrogel (type D4) was bought from Cardiotech Intl. Inc., Wilmington, USA ([www.advbiomaterials.com](http://www.advbiomaterials.com)).

**Preparation of oxygen sensitive polystyrene microparticles:** Oxygen sensitive polystyrene microparticles were prepared following the disperse polymerization method<sup>1</sup>. Typically, PtOEP (6.0 mg), 4,4'-Bis(2-benzoxazolyl)stilbene (8.0 mg) and  $\alpha,\alpha'$ -Azobisisobutyronitrile (62.5 mg) were dissolved in styrene (7.0 mL) and methacrylic acid (60  $\mu$ L); the solution was quickly mixed with ethanol (25 mL) containing dissolved polyvinylpyrrolidone K-30 (0.188g). The mixture was then kept in the dark after purging with nitrogen for 30min to remove any oxygen. Polymerization was conducted for 24 h at 70 °C. After cooling to room temperature, the resulting particles were centrifuged and then washed with ethanol three times to remove any by-products. The final oxygen sensitive polystyrene microparticles were dispersed in ethanol (30 mL).

**Chameleon cloth preparation:** Polystyrene microparticles in ethanol (0.5 mL) were mixed with 5 % (w/w) polyurethane hydrogel (0.5 mL) in ethanol/water (90/10, v/v),

coated on a cotton thread which was then embroidered into a piece of cotton cloth without any fluorescent brightener. The cloth was dried at room temperature to obtain the chameleon cloth.

**Characterization of the prepared oxygen sensitive chameleon cloth:** Fluorescence profiles were obtained from a Hitachi F-4500 fluorometer (Hitachi Co. Ltd., Japan). An ultra bright 365 nm UV-LED (Nichia Corporation, Japan) was used to excite the chameleon cloth. A Nikon D300 CMOS digital camera (Nikon Co. Ltd., Japan) was used for recording color images. Microscopic images were obtained from Hitachi S-4800 Scanning electron microscopy (Hitachi Co. Ltd., Japan).

#### References:

- 1 Zhang, Z.L., Long, Y., Pan, J.B., Yan, X.M., 2010. *J Mater Chem* 20(6), 1179-1185.

#### Supporting Figures:

**Figure S1.** Fluorescence spectra of the oxygen sensitive chameleon cloth at different oxygen concentrations ( $\lambda_{exc}=365\text{ nm}$ )

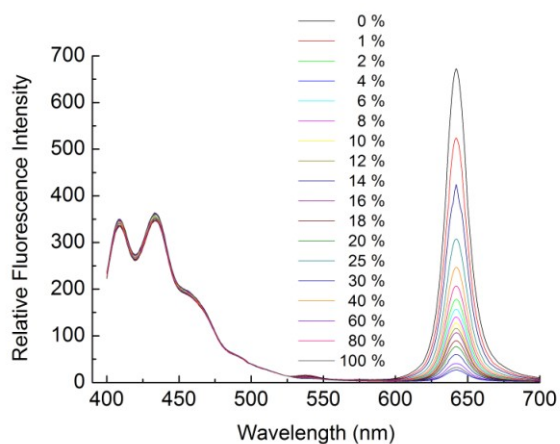

**Figure S2.** Spectral response of the CMOS chip showing the sensitivities of the red, green and blue (RGB) channels.

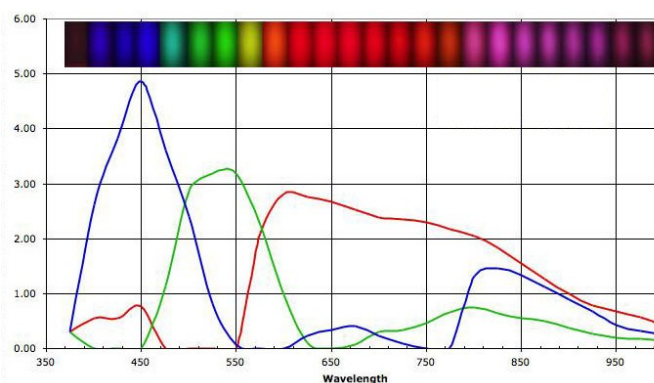

**Figure S3.** Fluorescence Spectra of the stilbene dye (FB) and PtOEP ( $\lambda_{exc}=365$  nm for emission spectra)

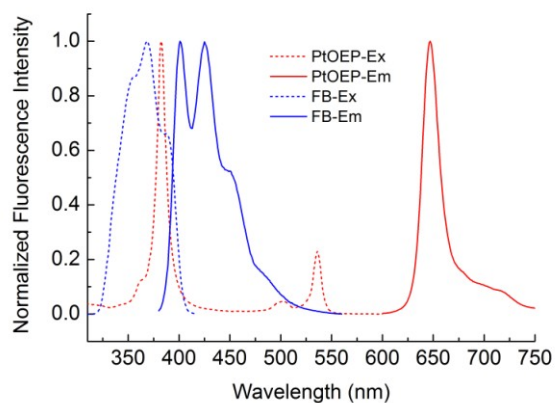

**Figure S4.** Linear relationship between  $I_0/I$  and oxygen concentration (measured at  $\lambda_{em}=642$  nm)

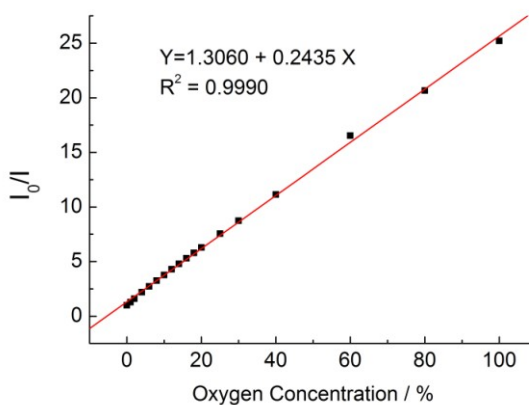

**Figure S5.** Photostabilities of the stilbene dye (FB) and PtOEP dye compared with fluorescein isothiocyanate (FITC) in diluted solutions.

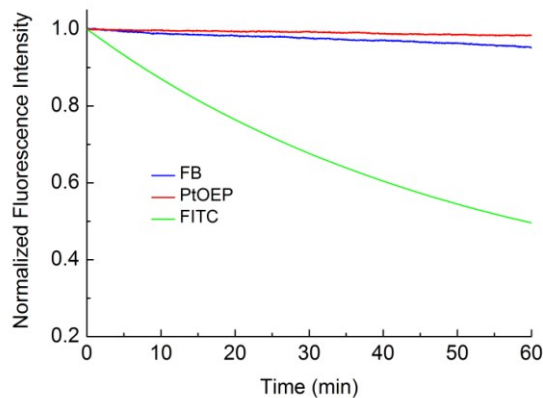

**Figure S6.** Photostability of the chameleon cloth before and after continuous exposed under sunshine for 7 days.

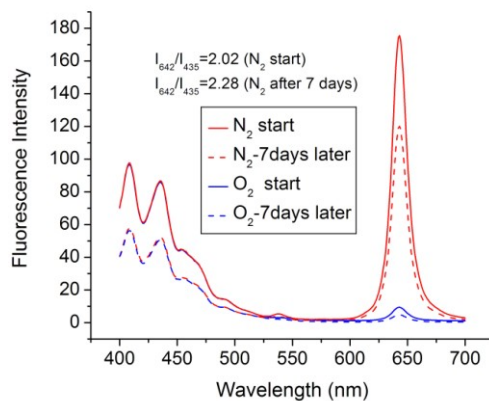

**Figure S7.** Reversibility and response time of the chameleon cloth

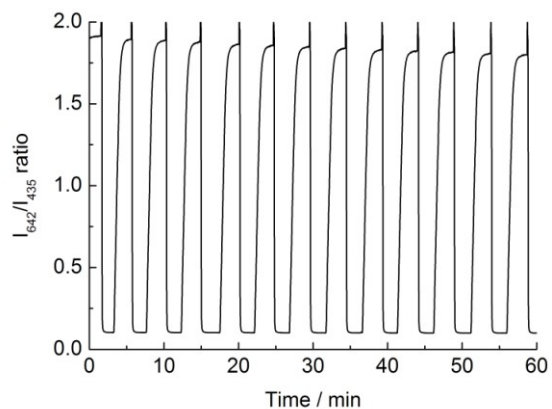

**Figure S8.** Physical stability of the label. A) real picture of the labeled cloth before immersing in water; B) real picture under UV lamp of the label before immersing in water; C) real picture under UV lamp of the label after immersing in water for 24h; D) real picture of the labeled cloth before washing using detergent; E) real picture under UV lamp of the label before washing using detergent; F) real picture under UV lamp of the label after washing using detergent.

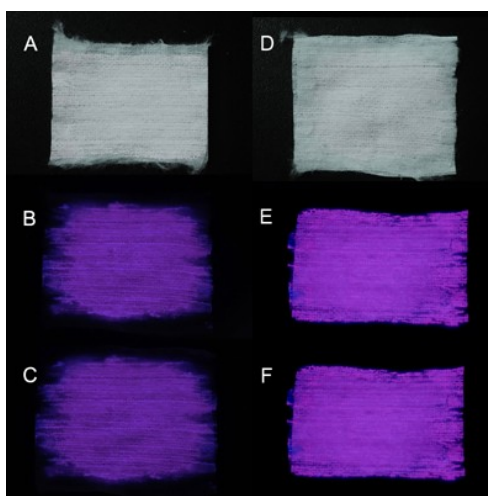

Supporting Video

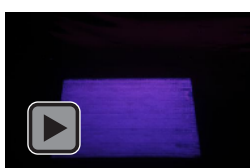

End...
